# Supplementary material
Source: MDPI journal article supplement (https://www.mdpi.com/2571-5577/6/1/22)
Supplement: s1 [file s1]

Archive with 1 entries (1 files):
- asi-2184245-supplementary.pdf
