# Supplementary material
Source: MDPI journal article supplement (https://www.mdpi.com/2571-5577/6/1/22)
Supplement: s1 [file s1 › asi-2184245-supplementary.pdf]

## QUESTIONNAIRE

### Lean Manufacturing through Management of Manufacturing Flexibility

This questionnaire has three sections.

**Section- I** seeks general information of industrial units.

**Section- 2** contains 6 subsections as under :

- (a) Parameters of labour flexibility
- (b) Parameters of machine flexibility
- (c) Parameters of volume flexibility
- (d) Parameters of product flexibility,
- (e) Parameters of routing flexibility and
- (f) Parameters of material handling flexibility

**Section -3** seeks information on parameters of lean manufacturing.

#### Section - I

|                         |  |
|-------------------------|--|
| <b>Name of Industry</b> |  |
| <b>Address</b>          |  |

|                                                                                                                                                                                                                                                |                                                                                    |                         |                                          |           |
|------------------------------------------------------------------------------------------------------------------------------------------------------------------------------------------------------------------------------------------------|------------------------------------------------------------------------------------|-------------------------|------------------------------------------|-----------|
| <b>Total number of employees</b>                                                                                                                                                                                                               | <50,<br>50-250,<br>above 250                                                       | <b>Size of Industry</b> | Micro/small/medium/large                 |           |
| <b>Sector</b>                                                                                                                                                                                                                                  | private<br>/public                                                                 | <b>Products</b>         | Components/Sub-assemblies/<br>Assemblies |           |
| <b>Market</b>                                                                                                                                                                                                                                  | Supplier to a bigger company / Spare parts market/ Original equipment manufacturer |                         |                                          |           |
| <p><b>Each of the following questions have four options from 1 to 4, 1 being the lowest and 4 the highest. Pick up the appropriate choice among (1) Strongly Disagree (SDA) (2) Disagree (DA) (3) Agree (A) and (4) Strongly agree(SA)</b></p> |                                                                                    |                         |                                          |           |
| <b>Section - 2</b>                                                                                                                                                                                                                             |                                                                                    |                         |                                          |           |
| <b>(a) Labour Flexibility</b>                                                                                                                                                                                                                  |                                                                                    |                         |                                          |           |
| <b>(i) Ability of workers to work on different machines</b>                                                                                                                                                                                    | <b>SDA</b>                                                                         | <b>DA</b>               | <b>A</b>                                 | <b>SA</b> |
| 1. Workers have the necessary education and skill levels for multiple tasks                                                                                                                                                                    | 1                                                                                  | 2                       | 3                                        | 4         |
| 2. Workers have the necessary attitude and motivation on carrying out diverse tasks                                                                                                                                                            | 1                                                                                  | 2                       | 3                                        | 4         |
| 3. Workers have been trained on multiple machines within a classification of tasks                                                                                                                                                             | 1                                                                                  | 2                       | 3                                        | 4         |
| 4. Workers perform more than one task                                                                                                                                                                                                          | 1                                                                                  | 2                       | 3                                        | 4         |
| 5. Workers achieve similar performance levels for all tasks                                                                                                                                                                                    | 1                                                                                  | 2                       | 3                                        | 4         |
| <b>(ii) Skill level of workers to perform different jobs</b>                                                                                                                                                                                   |                                                                                    |                         |                                          |           |
| 1. Workers possess diverse skills to perform tasks                                                                                                                                                                                             | 1                                                                                  | 2                       | 3                                        | 4         |
| 2. Workers can perform large number of tasks with in a classification of tasks e.g. machining                                                                                                                                                  | 1                                                                                  | 2                       | 3                                        | 4         |

|                                                                                                                                                                                    |   |   |   |   |
|------------------------------------------------------------------------------------------------------------------------------------------------------------------------------------|---|---|---|---|
| 3. Workers can perform tasks which differ greatly from one another( out of classification)<br>e.g. machinist doing an inspectors job                                               | 1 | 2 | 3 | 4 |
| <b>(iii) Cost effectiveness of workers over a job change</b>                                                                                                                       |   |   |   |   |
| 1. When a worker performs a task which is not his usual task, it is cost effective.                                                                                                | 1 | 2 | 3 | 4 |
| 2. Workers are equally efficient at multiple tasks they can perform.                                                                                                               | 1 | 2 | 3 | 4 |
| 3. When a worker performs a task which is not his normal task, the utilisation of machine and other resources are not affected adversely.                                          | 1 | 2 | 3 | 4 |
| <b>(iv) Reliability of workers over job change</b>                                                                                                                                 |   |   |   |   |
| 1. Workers are equally reliable for all tasks.                                                                                                                                     | 1 | 2 | 3 | 4 |
| 2. Workers are equally effective in terms of quality for all tasks.                                                                                                                | 1 | 2 | 3 | 4 |
| 3. A short time delay occurs when workers are moved between different tasks.                                                                                                       | 1 | 2 | 3 | 4 |
| <b>(v) Attitude of workers towards change of jobs</b>                                                                                                                              |   |   |   |   |
| 1. Workers show positive attitude towards change of job.                                                                                                                           | 1 | 2 | 3 | 4 |
| 2. It is easy to move workers between different tasks with in a classification of tasks.                                                                                           | 1 | 2 | 3 | 4 |
| 3. It is easy to move workers between different tasks even outside the classification of tasks or on entirely different job e.g. a fitter performs the task of a fork lift driver. | 1 | 2 | 3 | 4 |
| <b>(vi) Productivity effectiveness due to change</b>                                                                                                                               |   |   |   |   |
| 1. Resources of materials, energy and machine time are utilised optimally when workers are assigned tasks other than their usual tasks.                                            | 1 | 2 | 3 | 4 |
| 2. Workers are usually effective, in terms of                                                                                                                                      | 1 | 2 | 3 | 4 |

|                                                                                                      |   |   |   |   |
|------------------------------------------------------------------------------------------------------|---|---|---|---|
| productivity, for all tasks.                                                                         |   |   |   |   |
| <b>(vii) Cooperation of workers in achieving production targets</b>                                  |   |   |   |   |
| 1. Workers cooperate in achieving production targets.                                                | 1 | 2 | 3 | 4 |
| 2. Workers can move easily between different tasks in the interest of the organisation.              | 1 | 2 | 3 | 4 |
| <b>(viii) Ability of production workers to perform inspection jobs</b>                               |   |   |   |   |
| 1. Production workers are able to perform inspection jobs related to the products made by them.      | 1 | 2 | 3 | 4 |
| 2. Production workers understand the basic ideas of quality control and statistical quality control. | 1 | 2 | 3 | 4 |
| <b>(ix) Ability of production workers to do maintenance autonomously</b>                             |   |   |   |   |
| 1. Production workers are able to do autonomous maintenance.                                         | 1 | 2 | 3 | 4 |
| 2. Production workers take care of machinery and equipment operated by them.                         | 1 | 2 | 3 | 4 |
| 3. Production workers normally find out the cause of the quality problem and rectify minor problems. | 1 | 2 | 3 | 4 |
| <b>(x) Training of workers</b>                                                                       |   |   |   |   |
| 1. Workers are trained to perform many different tasks with in a classification.                     | 1 | 2 | 3 | 4 |
| 2. Workers are trained to perform many different tasks outside a classification.                     | 1 | 2 | 3 | 4 |
| 3. Workers are trained to perform inspection on tasks.                                               | 1 | 2 | 3 | 4 |
| 4. Workers are trained to perform maintenance tasks.                                                 | 1 | 2 | 3 | 4 |

| <b>(b) Machine Flexibility</b>                                                                                                                   |            |           |          |           |
|--------------------------------------------------------------------------------------------------------------------------------------------------|------------|-----------|----------|-----------|
| <b>(i) Ability of machines to perform diverse set of operations</b>                                                                              | <b>SDA</b> | <b>DA</b> | <b>A</b> | <b>SA</b> |
| 1. The product type, range and volumes are such that specialised machines with flexibility of producing different jobs on machines are required. | 1          | 2         | 3        | 4         |
| 2. The ability of performing various tasks on machines is achieved by set up change-overs by changing jigs and fixtures.                         | 1          | 2         | 3        | 4         |
| 3. CNC machines are used to a large extent in the organisation.                                                                                  | 1          | 2         | 3        | 4         |
| 4. Machining centres are used to a large extent in the organisation.                                                                             | 1          | 2         | 3        | 4         |
| 5. Machines can perform same operation on similar jobs which only differ in size.                                                                | 1          | 2         | 3        | 4         |
| 6. Machines can perform diverse operations on similar/non similar jobs.                                                                          | 1          | 2         | 3        | 4         |
| <b>(ii) Machine setup or change over</b>                                                                                                         |            |           |          |           |
| 1. Set up change-over between production of various products are easy and efficient.                                                             | 1          | 2         | 3        | 4         |
| 2. Machine set ups between operations are quick.                                                                                                 | 1          | 2         | 3        | 4         |
| 3. The company uses concept of Single Minute Exchange of Dies (SMED).                                                                            | 1          | 2         | 3        | 4         |
| 4. Set up change over requires only a sensor and / or a computer programme.                                                                      | 1          | 2         | 3        | 4         |
| <b>(iii) Time and effort needed to change the tools and operations</b>                                                                           |            |           |          |           |
| 1. The change of tooling etc. on the machine requires less effort and changeover gets approved mostly in the first time.                         | 1          | 2         | 3        | 4         |
| 2. Change over requires some effort and time.                                                                                                    | 1          | 2         | 3        | 4         |

|                                                                                                                                         |     |    |   |    |
|-----------------------------------------------------------------------------------------------------------------------------------------|-----|----|---|----|
| <b>(iv) Cost effectiveness of operations over machine change</b>                                                                        |     |    |   |    |
| 1. Processing cost of operations is not affected by machine choice.                                                                     | 1   | 2  | 3 | 4  |
| 2. Machines achieve similar performance levels across all operations.                                                                   | 1   | 2  | 3 | 4  |
| <b>(v) Productivity effectiveness due to change of machine</b>                                                                          |     |    |   |    |
| 1. Machines are equally effective in terms of productivity for all operations.                                                          | 1   | 2  | 3 | 4  |
| 2. Machines are equally efficient, for all processing operations.                                                                       | 1   | 2  | 3 | 4  |
| 3. Machines are equally effective in terms of quality for all operations.                                                               | 1   | 2  | 3 | 4  |
| <b>(vi) Obsolescence rate of machines due to introduction of new products</b>                                                           |     |    |   |    |
| 1. The machines do not become obsolete at a higher rate when a new product is introduced.                                               | 1   | 2  | 3 | 4  |
| 2. Existing machines can be used to perform some other operations in the company.                                                       | 1   | 2  | 3 | 4  |
| <b>(vii) Reliability of machines over a job change</b>                                                                                  |     |    |   |    |
| 1. Machines in a classification are equally reliable for all operations.                                                                | 1   | 2  | 3 | 4  |
| 2. Machines breakdown frequency does not increase due to rapid change in product and operations.                                        | 1   | 2  | 3 | 4  |
| <b>(c) Volume Flexibility</b>                                                                                                           |     |    |   |    |
|                                                                                                                                         | SDA | DA | A | SA |
| 1. You have encountered situations in which your production levels (due to demand) have been more or less than your installed capacity. | 1   | 2  | 3 | 4  |
| 2. In case of lower demand (production), you are able to use your idle capacity on some or the other operations (machine).              | 1   | 2  | 3 | 4  |

|                                                                                                                                                                                                                                                       |   |   |   |   |
|-------------------------------------------------------------------------------------------------------------------------------------------------------------------------------------------------------------------------------------------------------|---|---|---|---|
|                                                                                                                                                                                                                                                       |   |   |   |   |
| 3. You can deploy your manpower on some other operation/activity/functions.                                                                                                                                                                           | 1 | 2 | 3 | 4 |
| 4. The extent of idle capacity as a percentage of total capacity in the case of less demand is generally low.                                                                                                                                         | 1 | 2 | 3 | 4 |
| 5. For putting idle capacity to use on alternative operations, the rescheduling time and cost (for identifying alternative operations and deployment) is low.                                                                                         | 1 | 2 | 3 | 4 |
| 6. You have devised a system to meet such situation of under demand by installing your capacity to meet the lowest assured demand and sub contract the fluctuating portion of the demand.                                                             | 1 | 2 | 3 | 4 |
| 7. In case of a situation in which your demand is more than the installed capacity you use subcontracting.                                                                                                                                            | 1 | 2 | 3 | 4 |
| 8. In case of a situation in which your demand is more than the installed capacity you resort to overtime.                                                                                                                                            | 1 | 2 | 3 | 4 |
| 9. In case of a situation in which your demand is more than the installed capacity, you hire additional manpower and work on off days.                                                                                                                | 1 | 2 | 3 | 4 |
| 10. With the use of strategy listed in Q7 to 9 above, you are able to meet the order requirements fully.                                                                                                                                              | 1 | 2 | 3 | 4 |
| 11. In a situation where you find that the demand is higher and likely to remain higher in times to come, you are able to procure additional equipment without difficulty.                                                                            | 1 | 2 | 3 | 4 |
| 12. You use inventory as a strategy for meeting situation of fluctuating demand which is higher or lower than installed capacity (when demand is low, the inventory is stored; and used up when demand is high) but production rate remains constant. | 1 | 2 | 3 | 4 |

| <b>(d) Product Flexibility</b>                                                                                                                                         |     |    |   |    |
|------------------------------------------------------------------------------------------------------------------------------------------------------------------------|-----|----|---|----|
|                                                                                                                                                                        | SDA | DA | A | SA |
| 1. With present resources available with you, you are able to produce very large variety of products.                                                                  | 1   | 2  | 3 | 4  |
| 2. You are able to meet customers' demands by introducing new products frequently.                                                                                     | 1   | 2  | 3 | 4  |
| 3. In order to introduce new product, you find that change in tools and software is very difficult.                                                                    | 1   | 2  | 3 | 4  |
| 4. For introducing new products, you have to invest/spend a very large amount.                                                                                         | 1   | 2  | 3 | 4  |
| 5. While changing over to new range of products you find that shifting of machines or making necessary arrangement to set up is highly time consuming.                 | 1   | 2  | 3 | 4  |
| 6. You have CNC machines and flexible machining centres which can produce new variety of products with ease.                                                           | 1   | 2  | 3 | 4  |
| 7. You have facilities of rapid prototyping, rapid tooling, 3D printing, etc. for new product introduction.                                                            | 1   | 2  | 3 | 4  |
| <b>(e) Routing Flexibility</b>                                                                                                                                         |     |    |   |    |
|                                                                                                                                                                        | SDA | DA | A | SA |
| 1. You have encountered situations where in downtime because of breakdown of machinery is considerable.                                                                | 1   | 2  | 3 | 4  |
| 2. In case of breakdown of a machine in a production line, you are able to shift the work of the machine to another available in the same shop to continue production. | 1   | 2  | 3 | 4  |
| 3. The shifting of machines as mentioned in question 2 is very difficult.                                                                                              | 1   | 2  | 3 | 4  |

|                                                                                                                                                                                       |     |    |   |    |
|---------------------------------------------------------------------------------------------------------------------------------------------------------------------------------------|-----|----|---|----|
| 4. The shifting of machines as mentioned in question 2 is highly time consuming.                                                                                                      | 1   | 2  | 3 | 4  |
| 5. In case of breakdown of a machine, when the work is shifted to another machine, the material handling system can be shifted.                                                       | 1   | 2  | 3 | 4  |
| 6. For creating alternative routes, you keep adequate redundant capacity in production shop.                                                                                          | 1   | 2  | 3 | 4  |
| 7. When alternative routes are not used, the spare capacity is fully utilised.                                                                                                        | 1   | 2  | 3 | 4  |
| 8. You have built in flexibility in your machines and operations so that these can be utilised for various operations to take care of breakdowns.                                     | 1   | 2  | 3 | 4  |
| 9. You have CNC machines and flexible tooling to accommodate various products and operations so that breakdown of one machine does not affect some specific operations on products.   | 1   | 2  | 3 | 4  |
| <b>(f) Material Handling Flexibility</b>                                                                                                                                              |     |    |   |    |
|                                                                                                                                                                                       | SDA | DA | A | SA |
| 1. You have machining centres which are interconnected and support transportation of products, tools etc. and the time required to transport material between machine centres is low. | 1   | 2  | 3 | 4  |
| 2. In case of requirement of shifting paths between machine centres, you are able to change paths very easily.                                                                        | 1   | 2  | 3 | 4  |
| 3. Of the total machines, most of the machinery is interconnected.                                                                                                                    | 1   | 2  | 3 | 4  |
| 4. In case of breakdown of some machinery, material handling system in your company is able to support change of path without much problem.                                           | 1   | 2  | 3 | 4  |
| 5. Material handling system installed in your company works both for products (in process) and tooling etc.                                                                           | 1   | 2  | 3 | 4  |

| <b>Section – 3</b>                                                                                                                                 |            |           |          |           |
|----------------------------------------------------------------------------------------------------------------------------------------------------|------------|-----------|----------|-----------|
| <b>Lean manufacturing</b>                                                                                                                          |            |           |          |           |
|                                                                                                                                                    | <b>SDA</b> | <b>DA</b> | <b>A</b> | <b>SA</b> |
| <b>(i) Elimination of waste</b>                                                                                                                    |            |           |          |           |
| 1. The organisation does not produce many products which have to be reworked or repaired as compared to the industry standard.                     | 1          | 2         | 3        | 4         |
| 2. The percentage scrap rate is very low as compared to the industry standards.                                                                    | 1          | 2         | 3        | 4         |
| 3. The lay out and location of the plant is such that excessive movement for picking up or stacking parts is not carved out.                       | 1          | 2         | 3        | 4         |
| 4. The company generally makes as many products as are ordered by the customers. Excessive number of products are not made and kept in ware house. | 1          | 2         | 3        | 4         |
| 5. Production is carried out just before the time that the products are to be supplied to the customers. it is not carried out much in advance.    | 1          | 2         | 3        | 4         |
| 6. Extent of wasted effort to transport raw material is very low.                                                                                  | 1          | 2         | 3        | 4         |
| 7. Extent of wasted effort to transport finished goods into or out of storage is very low.                                                         | 1          | 2         | 3        | 4         |
| 8. Extent of wasted effort to transport WIP between processes is very low.                                                                         | 1          | 2         | 3        | 4         |
| 9. Raw material inventory levels are worked out scientifically and maintained. Excessive inventory is not kept.                                    | 1          | 2         | 3        | 4         |
| 10. WIP inventory is scientifically calculated and maintained. Excessive inventory is not maintained.                                              | 1          | 2         | 3        | 4         |
| 11. Inventory levels have declined over time.                                                                                                      | 1          | 2         | 3        | 4         |
| 12. Product designs are focused on customer requirements. Excessive features or processing is                                                      | 1          | 2         | 3        | 4         |

|                                                                                                                    |   |   |   |   |
|--------------------------------------------------------------------------------------------------------------------|---|---|---|---|
| not carried out.                                                                                                   |   |   |   |   |
| 13. Waiting time for other resources is low and machines do not remain excessively idle on account of this.        | 1 | 2 | 3 | 4 |
| 14. Waiting for supplies, parts etc is very low and does not affect machine up-time.                               | 1 | 2 | 3 | 4 |
| <b>(ii) Continuous Improvement</b>                                                                                 |   |   |   |   |
| 1. Annual percentage scraps shows a declining trend.                                                               | 1 | 2 | 3 | 4 |
| 2. Labour productivity shows rising trend.                                                                         | 1 | 2 | 3 | 4 |
| 3. Machine productivity shows rising trend.                                                                        | 1 | 2 | 3 | 4 |
| 4. TQM and Kaizen status has improved.                                                                             | 1 | 2 | 3 | 4 |
| 5. Training Programs for latest techniques and methods are held regularly.                                         | 1 | 2 | 3 | 4 |
| 6. Up gradation of machines and tools is done regularly.                                                           | 1 | 2 | 3 | 4 |
| 7. Cost of production has declined.                                                                                | 1 | 2 | 3 | 4 |
| 8. Process improvements have reduced cycle time, setup time, waste, breakdown, and have resulted in fool proofing. | 1 | 2 | 3 | 4 |
| 9. Suggestions per employee per year have increased.                                                               | 1 | 2 | 3 | 4 |
| 10. Percentage suggestions that have been implemented increased over a period of time.                             | 1 | 2 | 3 | 4 |
| 11. Rework percentage has reduced over a period of time.                                                           | 1 | 2 | 3 | 4 |
| <b>(iii) Zero defects</b>                                                                                          |   |   |   |   |
| 1. You have implemented fool proofing mechanisms and devices in your machinery and equipment.                      | 1 | 2 | 3 | 4 |

|                                                                                                                                                    |   |   |   |   |
|----------------------------------------------------------------------------------------------------------------------------------------------------|---|---|---|---|
| 2. Gauges and comparators are deployed in machines.                                                                                                | 1 | 2 | 3 | 4 |
| 3. Machines giving quality related problems are upgraded /replaced promptly to restore the capability index for the products manufactured on them. | 1 | 2 | 3 | 4 |
| 4. Workers deployed on machines are skilled and can maintain quality of products.                                                                  | 1 | 2 | 3 | 4 |
| 5. Statistical quality control of manufacturing processes is carried out.                                                                          | 1 | 2 | 3 | 4 |
| <b>(iv) Just in time deliveries</b>                                                                                                                |   |   |   |   |
| 1. Inventory investment shows declining trend over passage of time.                                                                                | 1 | 2 | 3 | 4 |
| 2. Production lead times as well as setup times have reduced /shortened over a period of time.                                                     | 1 | 2 | 3 | 4 |
| 3. Products are made against orders only. The company does not manufacture large quantities before receiving customer orders.                      | 1 | 2 | 3 | 4 |
| 4. Group technology and cellular layouts have been implemented wherever feasible.                                                                  | 1 | 2 | 3 | 4 |
| 5. Total Productive Maintenance (TPM) has been implemented.                                                                                        | 1 | 2 | 3 | 4 |
| 6. ERP has been implemented in your organisation.                                                                                                  | 1 | 2 | 3 | 4 |
| <b>(v) Pull of raw materials</b>                                                                                                                   |   |   |   |   |
| (1) Kanban cards for material movement and production purposes are used.                                                                           | 1 | 2 | 3 | 4 |
| (2) One piece lot is followed.                                                                                                                     | 1 | 2 | 3 | 4 |
| (3) Quality checks of incoming materials are performed at source.                                                                                  | 1 | 2 | 3 | 4 |
| (4) Stock levels in stores have reduced over a period of time.                                                                                     | 1 | 2 | 3 | 4 |

|                                                                                          |   |   |   |   |
|------------------------------------------------------------------------------------------|---|---|---|---|
| <b>(vi) Multifunctional Teams</b>                                                        |   |   |   |   |
| (1) Manpower is trained on multiple and complete jobs.                                   | 1 | 2 | 3 | 4 |
| (2) Workers are given freedom in their area of responsibility and are empowered.         | 1 | 2 | 3 | 4 |
| (3) Project teams have members and experts from various areas                            | 1 | 2 | 3 | 4 |
| (4) Small group activities or quality circles have been constituted and are active.      | 1 | 2 | 3 | 4 |
| <b>(vii) Decentralisation</b>                                                            |   |   |   |   |
| (1) Authority and responsibility are delegated and is properly communicated.             | 1 | 2 | 3 | 4 |
| (2) Financial powers are delegated at different levels.                                  | 1 | 2 | 3 | 4 |
| (3) Workload is logically and effectively distributed at various levels.                 | 1 | 2 | 3 | 4 |
| <b>(viii) Integration of functions</b>                                                   |   |   |   |   |
| (1) Quality policy clearly reflects and represents various functions / area of industry. | 1 | 2 | 3 | 4 |
| (2) Quality objectives are integrated with production objectives.                        | 1 | 2 | 3 | 4 |
| <b>(ix) Vertical information System</b>                                                  |   |   |   |   |
| (1) Information flows are adequate both from top to bottom and from bottom to top.       | 1 | 2 | 3 | 4 |
